# Supplementary material
Source: PubMed Central journal article supplement (PMC5557331)

## *Chlamydia trachomatis*

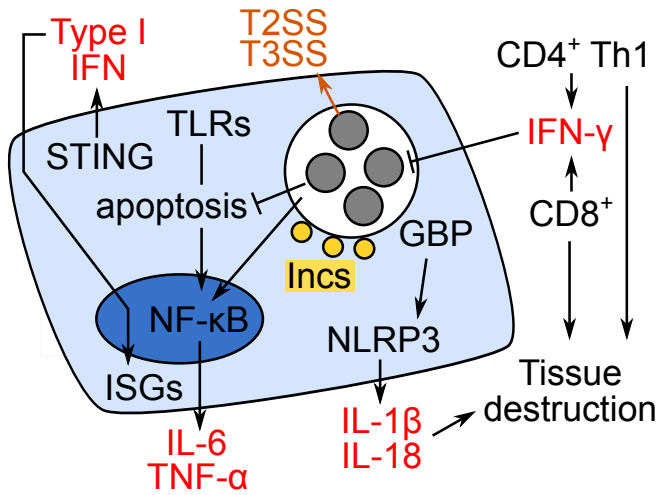

## *Anaplasma phagocytophilum*

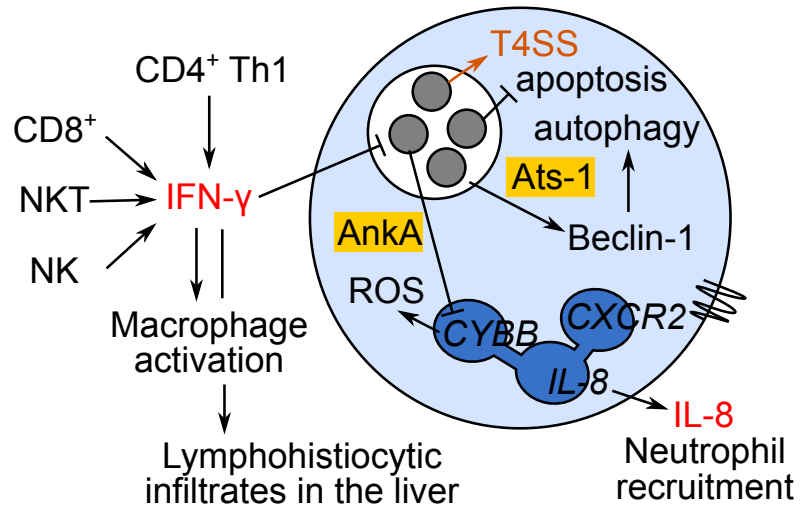

## *Coxiella burnetii*

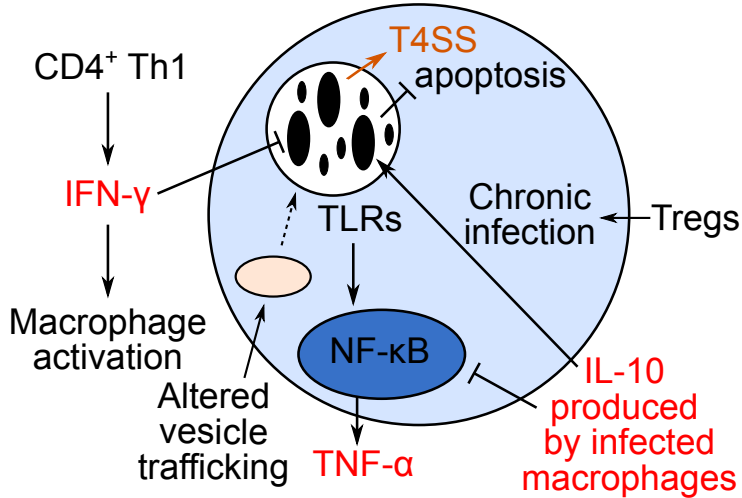

## *Ehrlichia* spp.

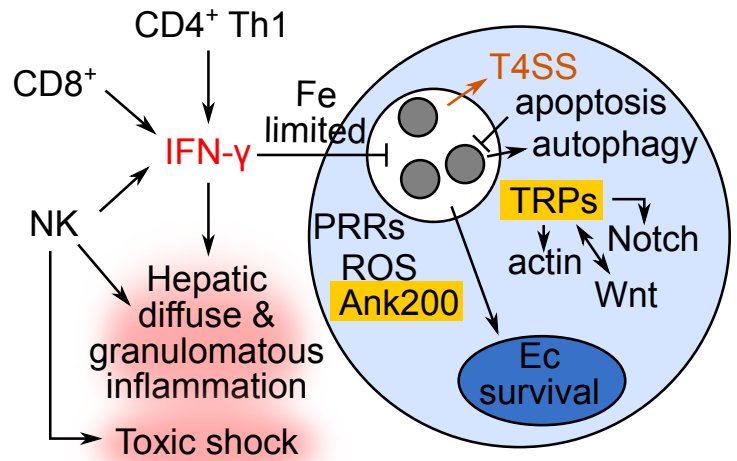

## *Rickettsia* spp.

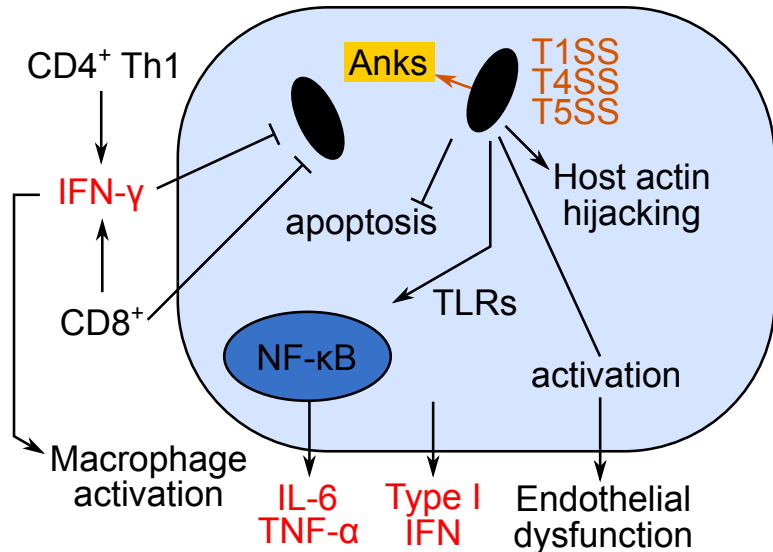

## *Orientia tsutsugamushi*

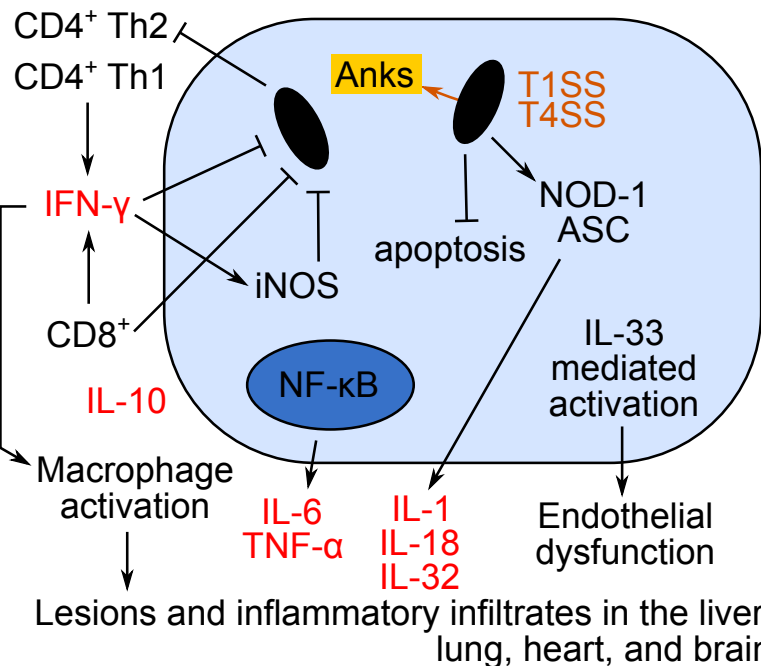

Supplement: NIHMS888695-supplement-supplement_1.pdf [file NIHMS888695-supplement-supplement_1.pdf]
